# Supplementary material
Source: MDPI journal article supplement (https://www.mdpi.com/2073-445X/10/10/1098)
Supplement: s1 [file s1]

Table S1 – Volume supplied, concentration of properties and deforestation across biomes in high-volume suppliers, their suppliers, and buyers (properties overlapping different biomes were included as others).

| High-volume suppliers              |             |             |                          |           |
|------------------------------------|-------------|-------------|--------------------------|-----------|
| Characteristic                     | Amazon      | Cerrado     | Pantanal                 | Other     |
| Volume to SIF (heads)              | 6,227,846   | 4,294,075   | 59,137                   | 653,702   |
| Volume to Non-SIF (heads)          | 342,580     | 140,588     | 8013                     | 29,356    |
| Volume to other properties (heads) | 5,631,047   | 3,251,901   | 37,472                   | 919,989   |
| N of properties                    | 686         | 331         | 52                       | 57        |
| Area (ha)                          | 2,952,768.8 | 1,465,594.6 | 9,656.3                  | 643,606.6 |
| Deforestation (ha)                 | 6864.1      | 19,854.5    | No data on deforestation | 1294      |

Table S2 – Volume supplied to SIF, non-SIF and to other properties by high-volume suppliers in different systems of cattle production and by properties not matched to property boundaries for which the classification of systems was not possible.

| Transaction                                      | System      |             |             |             |                       | Not matched |
|--------------------------------------------------|-------------|-------------|-------------|-------------|-----------------------|-------------|
|                                                  | Extensive   | ICLS        | Confinement | Mixed       | Not cattle productive |             |
| Supplied SIF <sup>(1)</sup>                      | 42.3%       | 12.5%       | 9.2%        | 6.4%        | 1%                    | 28.4%       |
| Mean supplied SIF <sup>(2)</sup>                 | 8.62 ± 11.6 | 12.2 ± 18.5 | 16.6 ± 14.4 | 23.4 ± 25.4 | 8.9 ± 6.2             | 12.9 ± 23.6 |
| Supplied Non-SIF <sup>(1)</sup>                  | 53.2%       | 8.6%        | 10.3%       | 4.3%        | <1%                   | 22%         |
| Mean supplied Non-SIF <sup>(2)</sup>             | 0.47 ± 2.2  | 0.36 ± 1.12 | 0.79 ± 2.45 | 0.67 ± 1.3  | 0.53 ± 0.83           | 0.43 ± 1.4  |
| Supply to other properties <sup>(1)</sup>        | 54.4%       | 10.4%       | 6.4         | 4%          | <1%                   | 23.8%       |
| Mean supplied to other properties <sup>(2)</sup> | 9.2 ± 15.3  | 8.4 ± 12.3  | 9.6 ± 12.45 | 11.8 ± 27.9 | 5.8 ± 6.4             | 9 ± 14.4    |

(1) Percent of volume relative to the total number of heads supplied by 1,483 properties in each type of transaction

(2) Means per property expressed in 1000 heads.

Table S3 – Land-use characteristics and volume supplied to SIF, non-SIF and to other properties and volume purchased by high-volume suppliers in different classes of size (i.e. small, medium and large high-volume suppliers)

| Characterization                                 | Class of Property Size |                   |                       |
|--------------------------------------------------|------------------------|-------------------|-----------------------|
|                                                  | Small                  | Medium            | Large                 |
| % Supplied SIF <sup>(1)</sup>                    | 9.63%                  | 14.5%             | 47.4%                 |
| Mean supplied SIF <sup>(2)</sup>                 | 9591.85 ± 16,158.91    | 8801.9 ± 14,264.6 | 11,180.86 ± 13,664.94 |
| % Supplied Non-SIF <sup>(1)</sup>                | 22.4%                  | 19%               | 36.5%                 |
| Mean supplied Non-SIF <sup>(2)</sup>             | 973.85 ± 4465.52       | 498,40 ± 1451.85  | 373.6 ± 1119.7        |
| % Supplied to other properties <sup>(1)</sup>    | 11.5%                  | 12.3%             | 52.218%               |
| Mean supplied to other properties <sup>(2)</sup> | 9523.98 ± 11,523.87    | 6173.5 ± 9,982.7  | 10,190.1 ± 17,499.8   |
| N of suppliers                                   | 149                    | 222               | 614                   |
| N of buyers                                      | 151                    | 246               | 641                   |
| Pasture (ha/property)                            | 126.62 ± 92            | 559.6 ± 297.3     | 2982.4 ± 3907.4       |
| Degraded pasture (ha/property)                   | 26.47 ± 37.9           | 91.4 ± 116.3      | 749.68 ± 1,420.6      |
| Cattle outflow level (heads/ ha/ year)           | 37 ± 62.52             | 3.1 ± 4.92        | 0.80 ± 0.97           |
| Rate of pasture degradation (%)                  | 16.31 ± 15.36          | 13.3 ± 12.8       | 17.6 ± 13.4           |
| Def Amazon (ha/property)                         | 1.78 ± 9.81            | 1.71 ± 7.4        | 10.90 ± 84.60         |
| Def Cerrado (ha/property)                        | 1 ± 7.26               | 3.21 ± 23.2       | 27.13 ± 146.7         |
| Def Suppliers Amazon (ha/property)               | 408.60 ± 766.50        | 247,27 ± 493      | 257.88 ± 484.6        |
| Def Suppliers Cerrado (ha/property)              | 403 ± 1275.3           | 369,16 ± 1117.6   | 491.77 ± 1421.12      |

(1) Percent of volume relative to the total number of heads supplied by 1,483 properties in each type of transaction. Properties not matched to property boundaries supplied 28.4%, 22% and 23.8% to SIF, non-SIF, and to other properties, respectively.

(2) Means per property expressed.
