# Supplementary material
Source: MDPI journal article supplement (https://www.mdpi.com/2073-445X/10/10/1098)
Supplement: s1 [file s1]

Archive with 1 entries (1 files):
- land-1411987-supplementary.pdf
